# Supplementary material
Source: Springer Nature journal article supplement (https://www.springermedizin.de/resource/supplementary/12889_2011_3760_MOESM2_ESM.pdf/9493338)

intervention

health problem

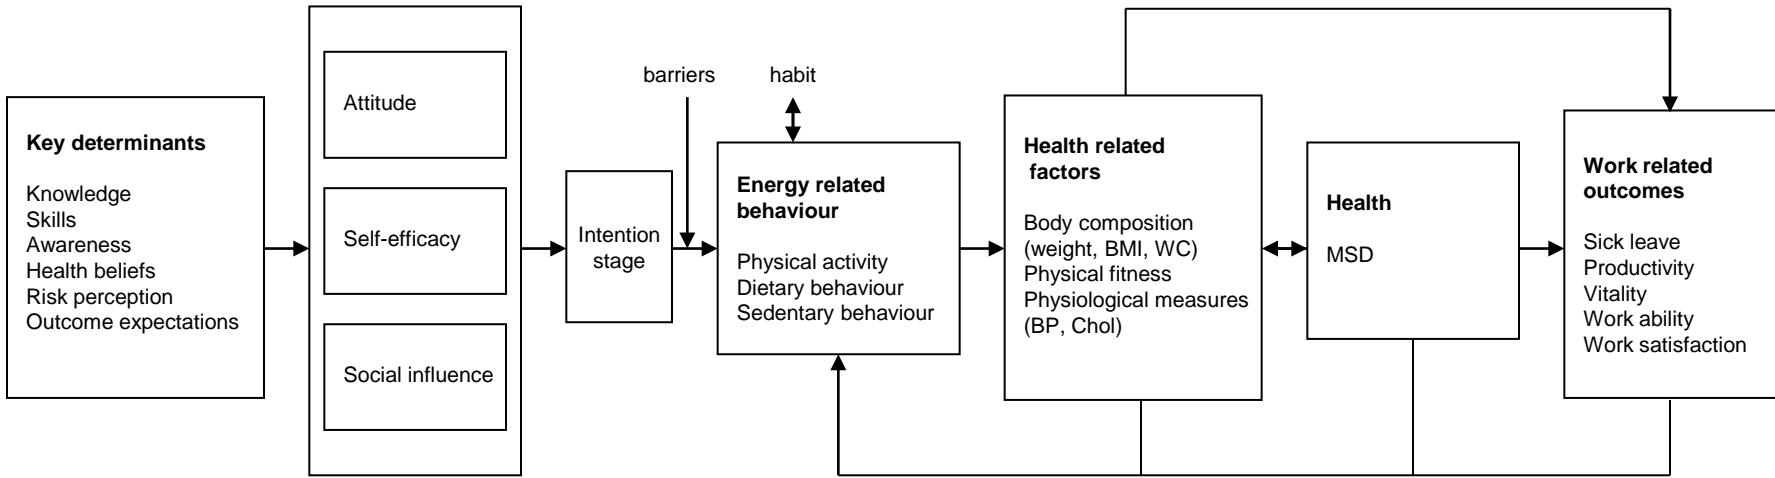

Supplement: MOESM2 [file 9493338]
